# Supplementary material for: Maternal obesity and severe pre-eclampsia among immigrant women: a mediation analysis
Source: PubMed Central journal article supplement (PMC7089990; doi:10.1038/s41598-020-62032-9), 2020-03-23
Supplement: 41598_2020_62032_MOESM1_ESM.pdf [file 41598_2020_62032_MOESM1_ESM.pdf]

## **Maternal obesity and severe pre-eclampsia among immigrant women: a mediation analysis**

### **SUPPLEMENTARY TABLES**

#### **Authors**

Ayesha Siddiqui MD MSc<sup>1,2\*</sup>, Catherine Deneux-Tharaux MD PhD<sup>1</sup>, Dominique Luton MD PhD<sup>3</sup>, Thomas Schmitz MD PhD<sup>4</sup>, Laurent Mandelbrot MD PhD<sup>5</sup>, Candice Estellat MD PhD<sup>6</sup>, Elizabeth A. Howell MD MPP<sup>7,8,9</sup>, Babak Khoshnood MD PhD<sup>1</sup>, Nathalie Bertille PhD<sup>1</sup>, and Elie Azria MD PhD<sup>1,10</sup>

#### **Affiliations**

<sup>1</sup>INSERM U1153 Obstetrical, Perinatal and Pediatric Epidemiology Research Team (EPOPé), Center for Epidemiology and Statistics Sorbonne Paris Cité, Risks in Pregnancy DHU, Paris Descartes University, Paris, France

<sup>2</sup>Department of Family Medicine and Community Health, Icahn School of Medicine at Mount Sinai, New York, NY, USA

<sup>3</sup>Department of Obstetrics and Gynecology, Beaujon-Bichat Hospital, University Hospital Department (DHU) Risks in Pregnancy, Paris Diderot University, Paris, France

<sup>4</sup>Department of Obstetrics and Gynecology, Robert Debré Hospital, Paris Diderot University, Paris, France

<sup>5</sup>Department of Obstetrics and Gynecology, Louis Mourier Hospital, University Hospital Department (DHU) Risks in Pregnancy, Paris Diderot University, Colombes, France

<sup>6</sup>Pitié-Salpêtrière Hospital – Charles Foix; Department of Biostatistics, Public Health and Medical Information, Clinical Research Unit, Pharmacoepidemiology Center (Céphépi), Sorbonne University; INSERM UMR-S 1136 - Pierre Louis Institute of Epidemiology and Public Health, Paris, France

<sup>7</sup>Department of Population Health Science and Policy, Icahn School of Medicine at Mount Sinai, New York, NY, USA

<sup>8</sup>Department of Obstetrics, Gynecology, and Reproductive Science, Icahn School of Medicine at Mount Sinai, New York, NY, USA

<sup>9</sup>Blavatnik Family Women's Health Research Institute, Icahn School of Medicine at Mount Sinai, New York, NY, USA

<sup>10</sup>Maternity Unit, Notre Dame de Bon Secours -Paris Saint Joseph Hospital/ University Hospital Department (DHU) Risks in Pregnancy, Paris Descartes University

**\*Corresponding author**

Ayesha Siddiqui, MD MSc

INSERM U115 Obstetrical, Perinatal and Pediatric Epidemiology Research Team

Center for Epidemiology and Statistics Sorbonne Paris Cité

Maternité Port-Royal 6ème étage

53 avenue de l'Observatoire

75014 Paris, France

ayesha.siddiqui@inserm.fr

**Supplementary table 1. Sensitivity analysis: Obesity\*-mediated effect of maternal place of birth on severe preeclampsia - additional adjustment by prenatal care utilization**

|                                | Total unadjusted OR<br>(95%CI) | <i>Adjusted for: age, parity**, overall social deprivation***, and prenatal care utilization†</i> |                         |                                             |
|--------------------------------|--------------------------------|---------------------------------------------------------------------------------------------------|-------------------------|---------------------------------------------|
|                                |                                | Total adjusted aOR<br>(95%CI)                                                                     | Direct aOR<br>(95%CI)   | Obesity-mediated indirect<br>aOR<br>(95%CI) |
| N                              | 6476                           | 6459                                                                                              |                         |                                             |
| <b>Maternal place of birth</b> |                                |                                                                                                   |                         |                                             |
| France and Europe              | 1.00                           | 1.00                                                                                              | 1.00                    | 1.00                                        |
| North Africa                   | 0.77 (0.33-1.81)               | 0.80 (0.36-1.78)                                                                                  | 0.75 (0.34-1.65)        | 1.07 (1.00-1.13)                            |
| Sub-Saharan Africa             | 2.27 (1.00-5.13)               | <b>2.52 (1.33-4.74)</b>                                                                           | <b>2.13 (1.14-3.99)</b> | <b>1.18 (1.04-1.35)††</b>                   |
| Other                          | 1.33 (0.47-3.75)               | 1.34 (0.41-4.36)                                                                                  | 1.43 (0.44-4.69)        | 0.94 (0.88-1.01)                            |

\*Obesity (BMI >= 30kg/m<sup>2</sup>); reference: normal weight (BMI 18.5-24.9kg/m<sup>2</sup>)

\*\*Primiparous or multiparous

\*\*\*Any of the following: (1) socially isolated (2) poor housing conditions (3) no work-related household income (4) no standard health insurance

† >50% or <50% of recommended as per the French Haute Autorité de Santé recommendations, 2016

††Indirect effect: 18.0%

**Supplementary table 2. Sensitivity analysis: Obesity-mediated effect of self-reported maternal origin on severe preeclampsia**

|                                | <i>Adjusted for age, parity**, and overall social deprivation***</i> |                              |                         |                                         |
|--------------------------------|----------------------------------------------------------------------|------------------------------|-------------------------|-----------------------------------------|
|                                | Total unadjusted OR<br>(95%CI)                                       | Total adjusted OR<br>(95%CI) | Direct aOR<br>(95%CI)   | Obesity-mediated indi<br>aOR<br>(95%CI) |
| N                              | 6469                                                                 | 6466                         |                         |                                         |
| <b>Maternal place of birth</b> |                                                                      |                              |                         |                                         |
| France and Europe              | 1.00                                                                 | 1.00                         | 1.00                    | 1.00                                    |
| North Africa                   | 0.76 (0.36-1.61)                                                     | 0.87 (0.44-1.73)             | 0.80 (0.41-1.57)        | <b>1.08 (1.01-1.17)</b>                 |
| Sub-Saharan Africa             | <b>2.24 (1.14-4.41)</b>                                              | <b>2.75 (1.32-5.74)</b>      | <b>2.34 (1.16-4.74)</b> | <b>1.18 (1.03-1.35)††</b>               |
| Other                          | 1.36 (0.57-3.24)                                                     | 1.49 (0.49-4.53)             | 1.55 (0.51-4.69)        | 0.96 (0.91-1.02)                        |

\*Obesity (BMI  $\geq 30\text{kg/m}^2$ ); reference: normal weight (BMI 18.5-24.9kg/m<sup>2</sup>)

\*\*Primiparous or multiparous

\*\*\*Any of the following: (1) socially isolated (2) poor housing conditions (3) no work-related household income (4) no standard health insurance

† >50% or <50% of recommended as per the French Haute Autorité de Santé recommendations, 2016

††indirect effect: 15.9%
